# Supplementary material for: A novel acid-controlled second-order nonlinear optical switch based on dimethyldihydropyrene/cyclophanediene photoswitch
Source: Royal Society of Chemistry journal article supplement (doi:10.1039/d2tc02521c), 2022-01-01
Supplement: d2tc02521c1.pdf [file d2tc02521c1.pdf]

**A novel acid-controlled second-order nonlinear optical switch based  
on dimethyldihdropyrene/cyclophanediene photoswitch**

Yao Yao<sup>a</sup>, Hong-Liang Xu<sup>a,\*</sup>, Zhong-Min Su<sup>b</sup>

a. Institute of Functional Material Chemistry, National & Local United Engineering Laboratory  
for Power Batteries, Department of Chemistry, Northeast Normal University, Changchun, 130024,  
People's Republic of China.

b. School of Chemistry & Environmental Engineering, Changchun University of Science and  
Technology, Changchun, 130012, People's Republic of China.

Email: [hlxu@nenu.edu.cn](mailto:hlxu@nenu.edu.cn)

**Fig. S1.** The structure of transient state and the corresponding imaginary frequency for studied compounds.

**Fig. S2.** (a) The comparison of UV-vis absorption spectra of compound **IV-C** and their protonated compounds; (b) Plot of the  $-\gamma_{yy}^{yy(2)}$  for compound **IV-C-AH<sup>+</sup>** and the corresponding  $\beta_{yyy}$  value (Yellow color represents positive value, while blue color represents negative value).

**Table S1** The Gibbs free energy (a.u.) and energy barrier of all studied compounds at M062X/6-311+G (d, p) level (at room temperature).

**Table S2** The HOMO-LUMO energy (eV) of studied closed-ring compounds in B3LYP and  $\omega$ B97XD method in acetonitrile solution.

**Table S3** The components of the first hyperpolarizabilities (a.u.) of the studied compounds computed at the  $\omega$ B97XD/6-31+G(d, p) level of theory in acetonitrile solution.

**Table S4** The total second hyperpolarizability  $\gamma$  and the  $\gamma$  ratios contrast of some studied compounds calculated at  $\omega$ B97XD/6-31+G(d, p) in CH<sub>3</sub>CN.

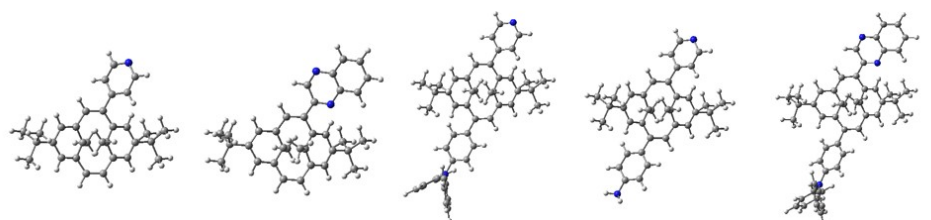

| Compound            | I-TS    | II-TS    | III-TS  | IV-TS   | V-TS     |
|---------------------|---------|----------|---------|---------|----------|
| imaginary frequency | -890.67 | -1551.03 | -889.73 | -890.69 | -1695.68 |

**Fig. S1.** The structure of transient state and the corresponding imaginary frequency for studied compounds.

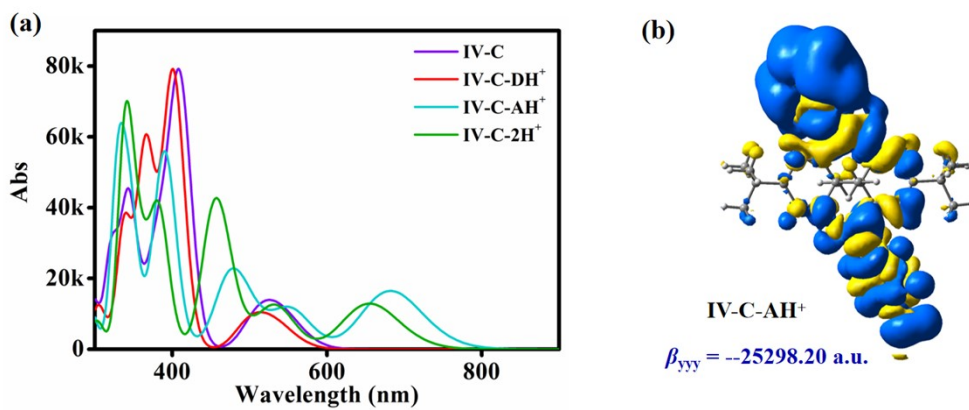

**Fig. S2.** (a) The comparison of UV-vis absorption spectra of compound IV-C and their protonated compounds; (b) Plot of the  $-\gamma_{yy}^{yy(2)}$  for compound IV-C-AH<sup>+</sup> and the corresponding  $\beta_{yyy}$  value (Yellow color represents positive value, while blue color represents negative value).

**Table S1** The Gibbs free energy (a.u.) and energy barrier of all studied compounds at M062X/6-311+G (d, p) level (at room temperature).

| Compounds     | Gibbs free energy (a.u.) | Energy barrier (Kcal/mol) |
|---------------|--------------------------|---------------------------|
| <b>I-C</b>    | -1256.36967              | 39.40                     |
| <b>I-TS</b>   | -1256.30688              |                           |
| <b>I-O</b>    | -1256.35164              | 28.09                     |
| <b>II-C</b>   | -1425.99816              | 46.53                     |
| <b>II-TS</b>  | -1425.92401              |                           |
| <b>II-O</b>   | -1425.98054              | 35.47                     |
| <b>III-C</b>  | -2004.53322              | 38.25                     |
| <b>III-TS</b> | -2004.47227              |                           |
| <b>III-O</b>  | -2004.51707              | 28.11                     |
| <b>IV-C</b>   | -1542.66216              | 38.47                     |
| <b>IV-TS</b>  | -1542.60085              |                           |
| <b>IV-O</b>   | -1542.64665              | 28.74                     |
| <b>V-C</b>    | -2174.12942              | 46.79                     |
| <b>V-TS</b>   | -2174.05485              |                           |
| <b>V-O</b>    | -2174.11349              | 36.80                     |

**Table S2** The HOMO-LUMO energy (eV) of studied closed-ring compounds in B3LYP and  $\omega$ B97XD method in acetonitrile solution.

|                            | B3LYP | $\omega$ B97XD |
|----------------------------|-------|----------------|
| <b>I-C</b>                 | 3.00  | 6.20           |
| <b>I-C-H<sup>+</sup></b>   | 2.32  | 5.53           |
| <b>II-C</b>                | 2.75  | 6.00           |
| <b>II-C-H<sup>+</sup></b>  | 1.38  | 4.26           |
| <b>III-C</b>               | 2.85  | 6.02           |
| <b>III-C-H</b>             | 2.18  | 5.38           |
| <b>IV-C</b>                | 2.86  | 6.02           |
| <b>IV-C-DH<sup>+</sup></b> | 2.91  | 6.08           |
| <b>IV-C-AH<sup>+</sup></b> | 2.20  | 5.36           |
| <b>IV-C-2H<sup>+</sup></b> | 2.34  | 5.53           |
| <b>V-C</b>                 | 2.62  | 5.83           |
| <b>V-C-2H<sup>+</sup></b>  | 1.17  | 4.08           |

**Table S3** The components of the first hyperpolarizabilities (a.u.) of the studied compounds computed at the  $\omega$ B97XD/6-31+G (d, p) level of theory in acetonitrile solution.

|     | <b>I-C</b>  | <b>I-C-H<sup>+</sup></b>   | <b>II-C</b>                | <b>II-C-2H<sup>+</sup></b> | <b>III-C</b> | <b>III-C-H<sup>+</sup></b> |
|-----|-------------|----------------------------|----------------------------|----------------------------|--------------|----------------------------|
| XXX | 13.22       | 12.56                      | -231.144                   | 6645.09                    | 448.41       | -286.272                   |
| XXY | -889.90     | -3395.19                   | -1018.33                   | -10016.3                   | -1640.43     | -3820.02                   |
| XYY | 735.16      | 5029.99                    | 1093.75                    | 35684.7                    | 2755.34      | 9174.2                     |
| YYY | -2658.56    | -6937.15                   | -3873.1                    | -44830.2                   | -6592.04     | -24507.1                   |
| XXZ | -30.54      | -14.00                     | 10.4953                    | -1788.00                   | 15.0722      | 167.826                    |
| XYZ | 25.52       | 150.83                     | -55.4731                   | 8025.18                    | 87.0428      | -471.993                   |
| YYZ | 131.57      | 149.70                     | -312.871                   | -12496.9                   | -493.165     | 1242.02                    |
| XZZ | -82.70      | -152.31                    | -14.6745                   | 1751.15                    | -708.623     | -667.248                   |
| YZZ | 268.26      | 381.14                     | 264.547                    | -2659.19                   | 1539.76      | 1696                       |
| ZZZ | -13.51      | 19.13                      | 6.48481                    | -549.327                   | 241.997      | -52.3827                   |
|     | <b>IV-C</b> | <b>IV-C-DH<sup>+</sup></b> | <b>IV-C-AH<sup>+</sup></b> | <b>IV-C-2H<sup>+</sup></b> |              |                            |
| XXX | 202.159     | -188.476                   | 77.08                      | -1040.09                   |              |                            |
| XXY | -1183.34    | -893.241                   | -4295.54                   | -2377.30                   |              |                            |
| XYY | 2370.12     | 645.308                    | 10044.40                   | 4885.02                    |              |                            |
| YYY | -7741.14    | -1650.59                   | -25298.20                  | -14061.60                  |              |                            |
| XXZ | -94.1475    | -59.3261                   | 41.09                      | -31.02                     |              |                            |
| XYZ | 185.008     | -10.9747                   | -226.57                    | -110.48                    |              |                            |
| YYZ | -312.641    | 153.705                    | 1097.63                    | 665.48                     |              |                            |
| XZZ | -36.5304    | -43.0256                   | -126.13                    | -82.48                     |              |                            |
| YZZ | 262.658     | 170.954                    | 392.50                     | 302.59                     |              |                            |
| ZZZ | 16.8192     | -24.2069                   | -53.30                     | -30.06                     |              |                            |

**Table S4** The total second hyperpolarizability  $\gamma_{\text{tot}}$  and the  $\gamma$  ratios contrast of some studied compounds calculated at  $\omega$ B97XD/6-31+G(d, p) in CH<sub>3</sub>CN.

| Compound                   | $\gamma_{\text{tot}}$   | $\gamma_{\text{tot}}(\text{protonated})/\gamma_{\text{tot}}(\text{neutral})$ |
|----------------------------|-------------------------|------------------------------------------------------------------------------|
| <b>I-C</b>                 | $4.18 \times 10^5$ a.u. | 2.0                                                                          |
| <b>I-C-H<sup>+</sup></b>   | $8.33 \times 10^5$ a.u. |                                                                              |
| <b>I-O</b>                 | $2.17 \times 10^5$ a.u. | 1.6                                                                          |
| <b>I-O-H<sup>+</sup></b>   | $3.54 \times 10^5$ a.u. |                                                                              |
| <b>II-C</b>                | $5.58 \times 10^5$ a.u. | 7.5                                                                          |
| <b>II-C-2H<sup>+</sup></b> | $4.16 \times 10^6$ a.u. |                                                                              |
| <b>V-C</b>                 | $1.28 \times 10^6$ a.u. | 15.6                                                                         |
| <b>V-C-2H<sup>+</sup></b>  | $2.00 \times 10^7$ a.u. |                                                                              |



Coordinates of the optimal structure (in acetonitrile)

**I-C**

|   |             |             |             |
|---|-------------|-------------|-------------|
| C | -1.81453600 | -3.03571000 | 0.09422800  |
| C | -0.42445100 | -3.36279200 | 0.05473700  |
| C | -2.24238800 | -1.73988600 | -0.02189700 |
| C | -3.61283300 | -1.35274600 | 0.00798400  |
| C | -4.00705800 | -0.03896600 | 0.01137600  |
| C | -3.00233700 | 0.99294600  | 0.03820900  |
| C | -1.67093000 | 0.72430500  | -0.04752200 |
| C | -0.66088300 | 1.73339600  | 0.01352000  |
| C | 0.68057200  | 1.44896400  | 0.01166500  |
| C | 1.14202000  | 0.07658200  | 0.04821500  |
| C | 2.43756100  | -0.30212400 | -0.11382200 |
| C | 2.87206600  | -1.67553400 | -0.06047000 |
| C | 1.93660200  | -2.67016600 | 0.03801500  |
| C | 0.54154900  | -2.39324800 | 0.11399000  |
| C | 0.10065300  | -0.96968300 | 0.40338500  |
| C | -0.07857600 | -0.88464100 | 1.94960700  |
| C | -1.20673500 | -0.68150700 | -0.35093900 |
| C | -1.01048100 | -0.74053700 | -1.89770400 |
| H | -0.66391200 | -1.72864000 | -2.20824500 |
| H | -0.29060000 | 0.00937400  | -2.23462800 |
| H | -1.96991300 | -0.53931600 | -2.38100500 |
| H | -0.37820400 | 0.11882200  | 2.26089700  |
| H | 0.87594600  | -1.12273500 | 2.42632900  |
| H | -0.82770000 | -1.60096300 | 2.29421600  |
| C | 4.37472700  | -1.94862300 | -0.16669800 |
| C | 5.10048500  | -1.21118300 | 0.97650300  |
| H | 4.74603400  | -1.56319800 | 1.95055800  |
| H | 6.17841700  | -1.39476200 | 0.91754000  |
| H | 4.94463700  | -0.12920000 | 0.93042400  |
| C | 4.89667200  | -1.43419000 | -1.52303600 |
| H | 4.39152100  | -1.94300400 | -2.35001700 |
| H | 5.97135100  | -1.62671200 | -1.60763800 |
| H | 4.74329200  | -0.35782500 | -1.64237800 |
| C | 4.70465800  | -3.44287400 | -0.06006600 |
| H | 4.35769600  | -3.86582900 | 0.88807300  |
| H | 5.78872700  | -3.58192100 | -0.11137700 |
| H | 4.25857300  | -4.01638000 | -0.87870900 |
| C | -5.47739300 | 0.38777000  | 0.04707700  |
| C | -5.75337300 | 1.17555400  | 1.34311600  |

|   |             |             |             |
|---|-------------|-------------|-------------|
| H | -5.54928400 | 0.55693700  | 2.22269500  |
| H | -5.14100900 | 2.07892500  | 1.41422600  |
| H | -6.80361200 | 1.48372200  | 1.37737300  |
| C | -6.43531100 | -0.80966100 | 0.00076200  |
| H | -6.31225300 | -1.46221000 | 0.87088000  |
| H | -6.29015300 | -1.40816400 | -0.90418700 |
| H | -7.46864700 | -0.44988300 | 0.00092300  |
| C | -5.76880200 | 1.28500800  | -1.17214200 |
| H | -5.14760500 | 2.18530600  | -1.17497100 |
| H | -6.81671200 | 1.60285300  | -1.16324200 |
| H | -5.58350900 | 0.74267500  | -2.10482300 |
| H | -4.34977100 | -2.14690900 | 0.07172900  |
| H | -2.54524000 | -3.83489900 | 0.18846700  |
| H | 2.23576600  | -3.71298900 | 0.00556600  |
| H | 3.18336800  | 0.45961800  | -0.31444800 |
| H | -3.31358200 | 2.02689700  | 0.16319700  |
| H | -0.98192600 | 2.77098100  | 0.06752600  |
| H | -0.12814800 | -4.40664900 | -0.01005900 |
| C | 1.64695900  | 2.57593800  | 0.02996400  |
| C | 2.67997400  | 2.65317600  | 0.97031300  |
| C | 1.53353200  | 3.63477300  | -0.87430000 |
| C | 3.52755800  | 3.75323500  | 0.95886600  |
| H | 2.81457100  | 1.87105600  | 1.70952600  |
| C | 2.43352400  | 4.69196300  | -0.80172300 |
| H | 0.75969000  | 3.62907100  | -1.63451800 |
| N | 3.42415900  | 4.76807800  | 0.09261400  |
| H | 4.33042300  | 3.82392600  | 1.68900000  |
| H | 2.35449600  | 5.51822700  | -1.50449100 |

## I-O

|   |             |             |             |
|---|-------------|-------------|-------------|
| C | 1.56663100  | -3.10387100 | -0.18585500 |
| C | 0.43961600  | -3.17888000 | -0.92362600 |
| C | 2.08790500  | -1.85251200 | 0.43626100  |
| C | 3.37742900  | -1.44513300 | 0.06639700  |
| C | 3.82418800  | -0.13969600 | 0.26261700  |
| C | 2.85936800  | 0.78977600  | 0.66625800  |
| C | 1.56219900  | 0.40874000  | 1.02189000  |
| C | 0.52730400  | 1.47110100  | 0.92988000  |
| C | -0.59635800 | 1.42627700  | 0.16982400  |
| C | -1.12684400 | 0.15203800  | -0.42247300 |
| C | -2.40475400 | -0.24602100 | -0.02351200 |
| C | -2.85612100 | -1.56103800 | -0.17085200 |
| C | -1.90306500 | -2.49923400 | -0.56226100 |
| C | -0.61388200 | -2.12360600 | -0.96240100 |

|   |             |             |             |
|---|-------------|-------------|-------------|
| C | -0.29864100 | -0.76086400 | -1.10304700 |
| C | 0.86876300  | -0.30447600 | -1.93773600 |
| C | 1.25138900  | -0.96251500 | 1.12993000  |
| C | 0.09000600  | -1.44373800 | 1.95681500  |
| H | -0.21522700 | -2.45396800 | 1.68596800  |
| H | -0.77777000 | -0.78682300 | 1.90146100  |
| H | 0.41574100  | -1.46639600 | 3.00342900  |
| H | 1.45295200  | 0.48867300  | -1.47153500 |
| H | 0.47331600  | 0.09122300  | -2.88040400 |
| H | 1.53572200  | -1.13186000 | -2.18041900 |
| C | -4.28946200 | -1.92962700 | 0.22446100  |
| C | -5.27400200 | -1.06569800 | -0.58593400 |
| H | -5.15686900 | -1.24663000 | -1.65922200 |
| H | -6.30592600 | -1.30640600 | -0.30904600 |
| H | -5.11889200 | 0.00198000  | -0.40460500 |
| C | -4.49071600 | -1.66354400 | 1.72860900  |
| H | -3.78672000 | -2.25479100 | 2.32311700  |
| H | -5.50786500 | -1.93669700 | 2.02943500  |
| H | -4.34081300 | -0.60873500 | 1.97695800  |
| C | -4.60217700 | -3.40627800 | -0.05247500 |
| H | -4.44298800 | -3.66059900 | -1.10534400 |
| H | -5.65010100 | -3.61015400 | 0.18793600  |
| H | -3.98862400 | -4.07432100 | 0.56024700  |
| C | 5.24548200  | 0.32257900  | -0.07524800 |
| C | 5.19675300  | 1.30924700  | -1.25769600 |
| H | 4.75033900  | 0.83555000  | -2.13798200 |
| H | 4.60872500  | 2.20006600  | -1.01805700 |
| H | 6.20835800  | 1.63703000  | -1.52034300 |
| C | 6.15675900  | -0.85031500 | -0.46149700 |
| H | 5.82117300  | -1.34130500 | -1.38044800 |
| H | 6.20452800  | -1.60158400 | 0.33336800  |
| H | 7.17214700  | -0.48233500 | -0.63780700 |
| C | 5.85434600  | 1.02399200  | 1.15324000  |
| H | 5.26399200  | 1.89397600  | 1.45557200  |
| H | 6.86894700  | 1.36953400  | 0.92801100  |
| H | 5.90783100  | 0.33872100  | 2.00524900  |
| H | 4.01502700  | -2.17367300 | -0.42390500 |
| H | 2.22013500  | -3.97419200 | -0.17552500 |
| H | -2.12826100 | -3.55989200 | -0.51508500 |
| H | -3.04007500 | 0.48966000  | 0.46254200  |
| H | 3.08888200  | 1.85220100  | 0.63984800  |
| H | 0.81437000  | 2.44260000  | 1.32851500  |
| H | 0.20804400  | -4.13272300 | -1.39392400 |
| C | -1.42118700 | 2.64962200  | 0.00810400  |

|   |             |            |             |
|---|-------------|------------|-------------|
| C | -2.11374900 | 2.88291500 | -1.18511400 |
| C | -1.55041100 | 3.61698200 | 1.00988300  |
| C | -2.85450500 | 4.04850500 | -1.32797400 |
| H | -2.07143100 | 2.16293500 | -1.99543700 |
| C | -2.31839200 | 4.74930200 | 0.76795100  |
| H | -1.07981300 | 3.48440800 | 1.97789500  |
| N | -2.96725500 | 4.98381300 | -0.37772400 |
| H | -3.38680100 | 4.23975300 | -2.25686900 |
| H | -2.42451600 | 5.50390600 | 1.54395800  |

### I-TS

|   |             |             |             |
|---|-------------|-------------|-------------|
| C | 1.71771600  | -3.07640500 | -0.17448100 |
| C | 0.46026200  | -3.29970000 | -0.62928800 |
| C | 2.19430100  | -1.75474200 | 0.24294800  |
| C | 3.50936200  | -1.37699700 | 0.01733600  |
| C | 3.94744300  | -0.04686400 | 0.15552100  |
| C | 2.95976800  | 0.93148200  | 0.38888400  |
| C | 1.63178600  | 0.61215500  | 0.62106400  |
| C | 0.61266300  | 1.65355100  | 0.55233700  |
| C | -0.65665000 | 1.45792200  | 0.09529600  |
| C | -1.14187500 | 0.10132000  | -0.25907100 |
| C | -2.42573200 | -0.29438200 | 0.06113300  |
| C | -2.86721300 | -1.63135300 | -0.05112600 |
| C | -1.89600900 | -2.60027400 | -0.34430800 |
| C | -0.58069100 | -2.26660400 | -0.63936800 |
| C | -0.18360000 | -0.87293700 | -0.75087600 |
| C | 0.63589900  | -0.48311500 | -1.97381000 |
| C | 1.22624700  | -0.78071900 | 0.72240300  |
| C | 0.40747600  | -1.16600300 | 1.94669500  |
| H | -0.01826800 | -2.16594400 | 1.84944900  |
| H | -0.40186300 | -0.45660900 | 2.12825100  |
| H | 1.06623700  | -1.15958000 | 2.82135700  |
| H | 1.05405100  | 0.52006100  | -1.87743100 |
| H | -0.02096900 | -0.49372300 | -2.84984300 |
| H | 1.45099500  | -1.18584000 | -2.15273300 |
| C | -4.33157600 | -1.96688300 | 0.23634600  |
| C | -5.23125000 | -1.14677000 | -0.70944500 |
| H | -5.02121900 | -1.39345500 | -1.75508800 |
| H | -6.28618100 | -1.36476600 | -0.51150100 |
| H | -5.08248100 | -0.07056400 | -0.57989900 |
| C | -4.66630600 | -1.60870900 | 1.69785600  |
| H | -4.03162100 | -2.17186500 | 2.38944900  |
| H | -5.71173700 | -1.85141800 | 1.91674300  |

|   |             |             |             |
|---|-------------|-------------|-------------|
| H | -4.52269800 | -0.54277900 | 1.89767500  |
| C | -4.63764900 | -3.45519400 | 0.02128200  |
| H | -4.40282000 | -3.77144500 | -1.00017100 |
| H | -5.70289700 | -3.63819500 | 0.19205800  |
| H | -4.07885100 | -4.08992500 | 0.71634100  |
| C | 5.40494100  | 0.37609400  | -0.04282400 |
| C | 5.51475000  | 1.27796800  | -1.28826200 |
| H | 5.17416300  | 0.74612900  | -2.18237000 |
| H | 4.91415600  | 2.18648100  | -1.18518900 |
| H | 6.55554900  | 1.58111400  | -1.44534000 |
| C | 6.33725000  | -0.82793200 | -0.23571200 |
| H | 6.10064300  | -1.38450400 | -1.14804500 |
| H | 6.28593900  | -1.51771900 | 0.61286300  |
| H | 7.37089600  | -0.47935700 | -0.32217700 |
| C | 5.87950500  | 1.15807100  | 1.19751800  |
| H | 5.27628600  | 2.05455200  | 1.36789500  |
| H | 6.91986000  | 1.47528600  | 1.06861700  |
| H | 5.82069000  | 0.53469600  | 2.09540500  |
| H | 4.20471500  | -2.14391100 | -0.30948400 |
| H | 2.43868700  | -3.89015400 | -0.19577500 |
| H | -2.15178600 | -3.65469100 | -0.30463400 |
| H | -3.11545300 | 0.45820800  | 0.43268900  |
| H | 3.22960000  | 1.98428600  | 0.34732400  |
| H | 0.94117100  | 2.67212700  | 0.74645300  |
| H | 0.17512100  | -4.30874100 | -0.91745900 |
| C | -1.57760300 | 2.60961800  | -0.02669800 |
| C | -2.48701800 | 2.70501700  | -1.08745700 |
| C | -1.57449800 | 3.66314300  | 0.89420600  |
| C | -3.30942200 | 3.81941100  | -1.18283000 |
| H | -2.54811900 | 1.92047300  | -1.83363500 |
| C | -2.43826000 | 4.73505600  | 0.70778300  |
| H | -0.92172800 | 3.64096200  | 1.76008100  |
| N | -3.30150100 | 4.83319700  | -0.30910100 |
| H | -4.01236100 | 3.90185400  | -2.00862200 |
| H | -2.44130700 | 5.55522800  | 1.42214600  |

#### IV-C

|   |             |             |             |
|---|-------------|-------------|-------------|
| C | -2.07515700 | -1.09936500 | -0.07045400 |
| C | -1.05777600 | -2.11269700 | -0.09666900 |
| C | -1.70980900 | 0.23310700  | -0.11659500 |
| C | -2.62346500 | 1.31915500  | -0.01917800 |
| C | -2.22804300 | 2.63356400  | 0.01909400  |
| C | -0.82646900 | 2.94212400  | 0.02767300  |

|   |             |             |             |
|---|-------------|-------------|-------------|
| C | 0.13308200  | 1.98170700  | -0.07779000 |
| C | 1.52817700  | 2.27094000  | 0.00831200  |
| C | 2.49695100  | 1.30001300  | 0.01261500  |
| C | 2.12869400  | -0.09849100 | 0.02300700  |
| C | 3.00911000  | -1.12372800 | -0.13092700 |
| C | 2.61942200  | -2.51006800 | -0.10863700 |
| C | 1.28925200  | -2.82920400 | -0.05008100 |
| C | 0.27554000  | -1.83170700 | 0.01733600  |
| C | 0.67573100  | -0.40759500 | 0.34153400  |
| C | 0.53611100  | -0.26584300 | 1.88749300  |
| C | -0.25173600 | 0.55767400  | -0.41321100 |
| C | -0.09362100 | 0.43034400  | -1.95960600 |
| H | -0.34554800 | -0.57825900 | -2.29470500 |
| H | 0.92586900  | 0.66485000  | -2.27609100 |
| H | -0.77490700 | 1.13717300  | -2.44024700 |
| H | 0.82576100  | 0.73289800  | 2.22252900  |
| H | 1.19256700  | -0.99574900 | 2.36841000  |
| H | -0.49170200 | -0.46120400 | 2.20249500  |
| C | 3.72795700  | -3.56148000 | -0.20396500 |
| C | 4.71224200  | -3.35981400 | 0.96561400  |
| H | 4.20009100  | -3.47308500 | 1.92646300  |
| H | 5.51360600  | -4.10433900 | 0.91482500  |
| H | 5.17679000  | -2.36946100 | 0.94430200  |
| C | 4.47781400  | -3.39791800 | -1.54091800 |
| H | 3.79595700  | -3.53489000 | -2.38606300 |
| H | 5.27335400  | -4.14648100 | -1.61774900 |
| H | 4.94127100  | -2.41169500 | -1.63523700 |
| C | 3.18154600  | -4.99293300 | -0.13065300 |
| H | 2.63648000  | -5.16917000 | 0.80212700  |
| H | 4.01262100  | -5.70343000 | -0.17176700 |
| H | 2.51405900  | -5.21602100 | -0.96894200 |
| C | -3.22613100 | 3.79059300  | 0.12377700  |
| C | -2.99687700 | 4.55325700  | 1.44360500  |
| H | -3.14154100 | 3.89089700  | 2.30291200  |
| H | -1.98916600 | 4.97392800  | 1.50553000  |
| H | -3.70776900 | 5.38213900  | 1.52654600  |
| C | -4.68350000 | 3.31108900  | 0.09346800  |
| H | -4.91873700 | 2.67019200  | 0.94909200  |
| H | -4.90818200 | 2.75774500  | -0.82409000 |
| H | -5.35246900 | 4.17598000  | 0.13476900  |
| C | -3.00958900 | 4.74635200  | -1.06621600 |
| H | -1.99677400 | 5.15940200  | -1.07909500 |
| H | -3.71114800 | 5.58523700  | -1.00810600 |
| H | -3.17543400 | 4.22640100  | -2.01518200 |

|   |             |             |             |
|---|-------------|-------------|-------------|
| H | -3.67393200 | 1.07822000  | 0.07753300  |
| H | 0.96663500  | -3.86373100 | -0.10989900 |
| H | 4.05484400  | -0.89184400 | -0.30205400 |
| H | -0.51217900 | 3.97250700  | 0.17433200  |
| H | 1.82471200  | 3.31433600  | 0.08568300  |
| H | -1.37110500 | -3.14772200 | -0.21111200 |
| C | 3.92128800  | 1.71433200  | 0.06799400  |
| C | 4.80837800  | 1.19863500  | 1.01927200  |
| C | 4.42466600  | 2.67823000  | -0.80918200 |
| C | 6.11948400  | 1.65581200  | 1.04362600  |
| H | 4.47764500  | 0.45869000  | 1.73992400  |
| C | 5.75424000  | 3.06981200  | -0.70113600 |
| H | 3.79002100  | 3.10967800  | -1.57591600 |
| N | 6.60629900  | 2.57643400  | 0.20313200  |
| H | 6.81447600  | 1.26341800  | 1.78235700  |
| H | 6.15469000  | 3.81668100  | -1.38281600 |
| C | -3.49010700 | -1.55051400 | -0.02551100 |
| C | -4.43891500 | -1.11566800 | -0.95906100 |
| C | -3.91161800 | -2.47306000 | 0.93928100  |
| C | -5.75286500 | -1.56096700 | -0.92091300 |
| H | -4.13869500 | -0.42095500 | -1.73829300 |
| C | -5.22279200 | -2.92575900 | 0.98936000  |
| H | -3.19885100 | -2.83392900 | 1.67592100  |
| C | -6.17032600 | -2.47289500 | 0.05972100  |
| H | -6.46421200 | -1.20870300 | -1.66272800 |
| H | -5.52144300 | -3.63540400 | 1.75588800  |
| N | -7.47144800 | -2.96503400 | 0.06928300  |
| H | -8.15812500 | -2.35840700 | -0.35569900 |
| H | -7.78881500 | -3.30788600 | 0.96479000  |

#### IV-O

|   |             |             |             |
|---|-------------|-------------|-------------|
| C | 2.07954300  | -1.00952000 | -0.20749300 |
| C | 1.21537900  | -1.77247000 | -0.92468200 |
| C | 1.66291800  | 0.30305100  | 0.39494200  |
| C | 2.37551100  | 1.44315800  | -0.00507200 |
| C | 1.88271300  | 2.72986400  | 0.18986800  |
| C | 0.55635700  | 2.82433500  | 0.62499700  |
| C | -0.18372700 | 1.70146600  | 1.00239000  |
| C | -1.66057300 | 1.85978900  | 0.94480300  |
| C | -2.51073700 | 1.11867600  | 0.19044500  |
| C | -2.11410400 | -0.19442800 | -0.41946900 |
| C | -2.84308100 | -1.31808500 | -0.02363500 |

|   |             |             |             |
|---|-------------|-------------|-------------|
| C | -2.35032800 | -2.61716300 | -0.18026000 |
| C | -1.01836400 | -2.72598400 | -0.57246900 |
| C | -0.26262600 | -1.61108200 | -0.96438200 |
| C | -0.89571500 | -0.36367600 | -1.10531600 |
| C | -0.30079300 | 0.73093100  | -1.94997100 |
| C | 0.46154300  | 0.44977700  | 1.10383000  |
| C | -0.10888700 | -0.66584400 | 1.93723200  |
| H | 0.35805900  | -1.62250400 | 1.70280200  |
| H | -1.18951500 | -0.77019200 | 1.83794700  |
| H | 0.10297300  | -0.44038200 | 2.98874700  |
| H | -0.43506500 | 1.72543600  | -1.52537400 |
| H | -0.81110600 | 0.71784300  | -2.92024400 |
| H | 0.76107700  | 0.56921500  | -2.13450100 |
| C | -3.21559000 | -3.81965300 | 0.20928000  |
| C | -4.52483400 | -3.78191200 | -0.60109000 |
| H | -4.31897800 | -3.84065900 | -1.67468700 |
| H | -5.16399500 | -4.62848400 | -0.32847300 |
| H | -5.08863400 | -2.86292700 | -0.41520400 |
| C | -3.54105700 | -3.75138900 | 1.71368900  |
| H | -2.62187900 | -3.75740200 | 2.30839200  |
| H | -4.14736700 | -4.61405100 | 2.01023800  |
| H | -4.10166000 | -2.84653900 | 1.96613300  |
| C | -2.51055300 | -5.15297400 | -0.07366200 |
| H | -2.22633000 | -5.24218600 | -1.12712400 |
| H | -3.18463400 | -5.98158700 | 0.16413900  |
| H | -1.61085100 | -5.27551800 | 0.53769200  |
| C | 2.66759100  | 3.99246300  | -0.17936800 |
| C | 1.97566200  | 4.69841500  | -1.36116500 |
| H | 1.92367600  | 4.03480600  | -2.23038000 |
| H | 0.95649800  | 5.00568200  | -1.10872900 |
| H | 2.53453300  | 5.59588900  | -1.64749700 |
| C | 4.11291200  | 3.67256400  | -0.58492700 |
| H | 4.15577600  | 3.06920000  | -1.49720300 |
| H | 4.64385000  | 3.13590300  | 0.20800400  |
| H | 4.65296900  | 4.60385700  | -0.78134400 |
| C | 2.70381600  | 4.93916500  | 1.03466500  |
| H | 1.69772500  | 5.22978600  | 1.35107100  |
| H | 3.25360000  | 5.85317600  | 0.78603100  |
| H | 3.20117200  | 4.46159100  | 1.88493800  |
| H | 3.32515800  | 1.29139700  | -0.50594600 |
| H | -0.51410800 | -3.68616100 | -0.53026100 |
| H | -3.79971500 | -1.15980000 | 0.46699200  |
| H | 0.04837100  | 3.78552100  | 0.60379300  |
| H | -2.05114200 | 2.78573900  | 1.36329700  |



|   |             |             |             |
|---|-------------|-------------|-------------|
| H | 1.60206900  | -2.70337600 | -1.33547800 |
| C | -3.92887700 | 1.53567300  | 0.05716100  |
| C | -4.63058200 | 1.28518400  | -1.12712900 |
| C | -4.62877400 | 2.18802600  | 1.07719200  |
| C | -5.94708700 | 1.71048100  | -1.24376300 |
| H | -4.15187300 | 0.76606600  | -1.95060400 |
| C | -5.94663300 | 2.57154900  | 0.86105100  |
| H | -4.16542600 | 2.37712100  | 2.03929300  |
| N | -6.61497000 | 2.34881100  | -0.27577800 |
| H | -6.49437700 | 1.52685300  | -2.16545500 |
| H | -6.49684900 | 3.07711200  | 1.65133600  |
| C | 3.51241100  | -1.38262600 | -0.11136200 |
| C | 4.23767200  | -1.10441900 | 1.05489400  |
| C | 4.19368900  | -2.02164100 | -1.15487300 |
| C | 5.56775600  | -1.47200100 | 1.19011400  |
| H | 3.74507200  | -0.59052500 | 1.87550000  |
| C | 5.52535700  | -2.39177200 | -1.03372900 |
| H | 3.67967600  | -2.21266000 | -2.09232400 |
| C | 6.23730600  | -2.12772500 | 0.14575600  |
| H | 6.09944000  | -1.25051500 | 2.11127300  |
| H | 6.02830600  | -2.87790600 | -1.86504300 |
| N | 7.55426500  | -2.54536800 | 0.29387900  |
| H | 8.06300700  | -2.66930900 | -0.56965700 |
| H | 8.09415700  | -2.02483800 | 0.97023600  |

#### IV-TS

|   |             |             |             |
|---|-------------|-------------|-------------|
| C | 2.06850300  | -1.12126400 | -0.12844100 |
| C | 1.12971300  | -2.00829100 | -0.57349500 |
| C | 1.68025800  | 0.26177700  | 0.23870600  |
| C | 2.51055400  | 1.32968900  | -0.06633300 |
| C | 2.10522500  | 2.67048300  | 0.05809000  |
| C | 0.74795400  | 2.90266400  | 0.34994400  |
| C | -0.13864400 | 1.87619200  | 0.63101700  |
| C | -1.57314500 | 2.14190300  | 0.59250800  |
| C | -2.50346900 | 1.25641300  | 0.13866600  |
| C | -2.12309200 | -0.12830100 | -0.23153900 |
| C | -2.95160200 | -1.18975300 | 0.06672400  |
| C | -2.54905700 | -2.53927600 | -0.06817800 |
| C | -1.19907300 | -2.77420800 | -0.35199100 |
| C | -0.30209600 | -1.74232900 | -0.61750400 |
| C | -0.77625300 | -0.37240500 | -0.72436300 |
| C | -0.33943700 | 0.40961400  | -1.95534300 |
| C | 0.33669200  | 0.50502900  | 0.73484700  |

|   |             |             |             |
|---|-------------|-------------|-------------|
| C | -0.10202200 | -0.27723400 | 1.96511300  |
| H | 0.13449800  | -1.33839600 | 1.87315700  |
| H | -1.17269200 | -0.17136000 | 2.14912100  |
| H | 0.43243200  | 0.11625900  | 2.83602900  |
| H | -0.56210400 | 1.47374600  | -1.85988900 |
| H | -0.88549400 | 0.02515800  | -2.82314500 |
| H | 0.72826800  | 0.29076000  | -2.14704000 |
| C | -3.56312200 | -3.65485100 | 0.18915500  |
| C | -4.75847200 | -3.47793600 | -0.76816700 |
| H | -4.43287800 | -3.54477000 | -1.81117800 |
| H | -5.50416000 | -4.26045300 | -0.59142100 |
| H | -5.24990800 | -2.51023700 | -0.62932500 |
| C | -4.05976500 | -3.57629700 | 1.64633000  |
| H | -3.22554400 | -3.68912600 | 2.34605600  |
| H | -4.78282500 | -4.37521100 | 1.84296900  |
| H | -4.55197000 | -2.62223700 | 1.85680300  |
| C | -2.96273800 | -5.04793100 | -0.04234900 |
| H | -2.57700900 | -5.15630500 | -1.06116800 |
| H | -3.73504300 | -5.80879500 | 0.10623100  |
| H | -2.15008900 | -5.26208100 | 0.65907000  |
| C | 3.04523000  | 3.84906800  | -0.20397600 |
| C | 2.55711100  | 4.63533300  | -1.43662300 |
| H | 2.53778700  | 3.99282700  | -2.32268000 |
| H | 1.55073400  | 5.03770700  | -1.28796700 |
| H | 3.22754900  | 5.47770800  | -1.63849400 |
| C | 4.48791300  | 3.39231200  | -0.46235900 |
| H | 4.56738400  | 2.78972000  | -1.37272100 |
| H | 4.88185000  | 2.80591400  | 0.37417900  |
| H | 5.13108100  | 4.26830900  | -0.59042100 |
| C | 3.04688500  | 4.77711900  | 1.02638200  |
| H | 2.04780500  | 5.16718300  | 1.24166900  |
| H | 3.70935800  | 5.63213800  | 0.85413400  |
| H | 3.40063100  | 4.24359900  | 1.91437100  |
| H | 3.50646000  | 1.10387800  | -0.42948700 |
| H | -0.80716200 | -3.78644900 | -0.32578900 |
| H | -3.94918700 | -0.97252400 | 0.43791700  |
| H | 0.35558900  | 3.91627700  | 0.30867500  |
| H | -1.88720400 | 3.16252300  | 0.79932800  |
| H | 1.44270700  | -3.03133100 | -0.77007300 |
| C | -3.92036900 | 1.67036000  | 0.03450400  |
| C | -4.72643600 | 1.24416800  | -1.02844400 |
| C | -4.51675700 | 2.51833800  | 0.97409900  |
| C | -6.04041100 | 1.68497000  | -1.10741700 |
| H | -4.33041300 | 0.57980100  | -1.78860700 |

|   |             |             |             |
|---|-------------|-------------|-------------|
| C | -5.84099000 | 2.90232700  | 0.80309000  |
| H | -3.96351700 | 2.86043900  | 1.84204600  |
| N | -6.61056600 | 2.50405900  | -0.21560300 |
| H | -6.66857800 | 1.36279600  | -1.93472600 |
| H | -6.30992700 | 3.55944700  | 1.53196500  |
| C | 3.49214300  | -1.51785900 | -0.05298100 |
| C | 4.30685700  | -1.09566400 | 1.00783000  |
| C | 4.07590500  | -2.34726600 | -1.01980100 |
| C | 5.63085600  | -1.49329200 | 1.11099400  |
| H | 3.88985300  | -0.44559200 | 1.77135000  |
| C | 5.39999100  | -2.75123600 | -0.92833400 |
| H | 3.48633700  | -2.66555800 | -1.87467900 |
| C | 6.20321600  | -2.33281500 | 0.14275100  |
| H | 6.23300200  | -1.15596000 | 1.95001400  |
| H | 5.82525400  | -3.38760500 | -1.69936800 |
| N | 7.51309100  | -2.77816500 | 0.26994500  |
| H | 8.11618100  | -2.18129900 | 0.81751400  |
| H | 7.95492700  | -3.05945100 | -0.59350300 |
